# Supplementary material for: Pressure-Dependent Stability of Imidazolium-Based Ionic Liquid/DNA Materials Investigated by High-Pressure Infrared Spectroscopy
Source: MDPI journal article supplement (doi:10.3390/ma12244202), 2019-12-13
Supplement: s1 [file s1]

Supplementary Materials

# Pressure-Dependent Stability of Imidazolium-Based Ionic Liquid/DNA Materials Investigated by High-Pressure Infrared Spectroscopy

Teng-Hui Wang, Min-Hsiu Shen, Hai-Chou Chang

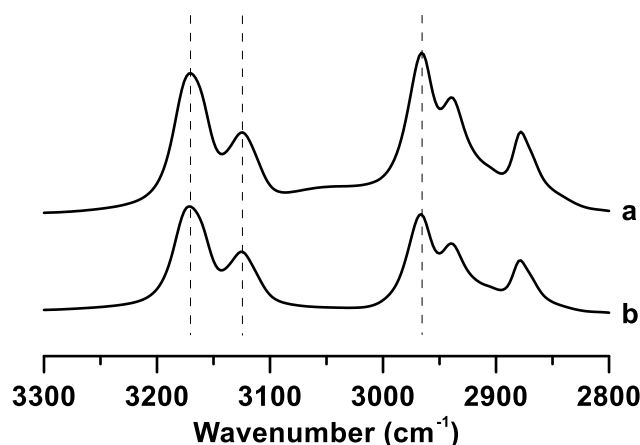

**Figure S1.** Infrared spectra of (a) pure  $[C_4MIM][PF_6]$  and (b)  $[C_4MIM][PF_6]$  with saturated water.

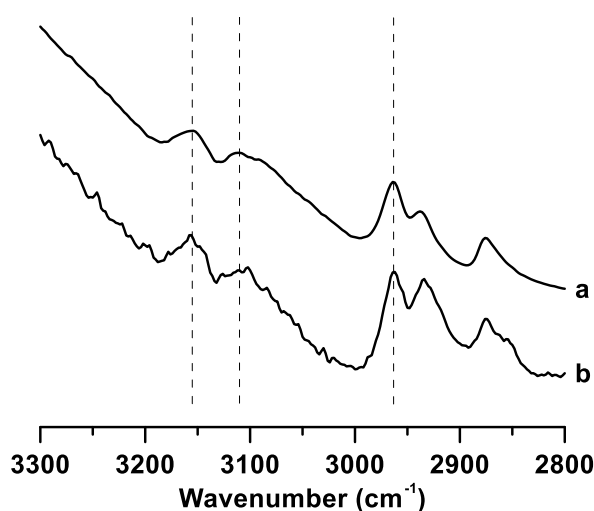

**Figure S2.** IR spectra of the  $[C_4MIM][PF_6]$ /DNA complex obtained at (a) ambient pressure and (b) cycled back to ambient.

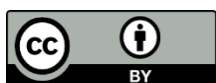

© 2019 by the authors. Submitted for possible open access publication under the terms and conditions of the Creative Commons Attribution (CC BY) license (<http://creativecommons.org/licenses/by/4.0/>).
